# Supplementary material for: Distinct AGO1 and AGO2 associated miRNA profiles in human cells and blood plasma
Source: PubMed Central journal article supplement — RNA Biol. 2012 Aug 1;9(8):1066–75. doi: 10.4161/rna.21083 (PMC3551861; doi:10.4161/rna.21083), 2012-08-01

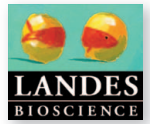

## **Supplemental Material to:**

**Andrey Turchinovich and Barbara Burwinkel**

**Distinct AGO1 and AGO2 associated miRNA  
profiles in human cells and blood plasma**

**RNA**

**Biology 2012; 9(8)**

**<http://dx.doi.org/10.4161/rna.21083>**

**[www.landesbioscience.com/journals/rnabiology/article/21083/](http://www.landesbioscience.com/journals/rnabiology/article/21083/)**

**S1:** Relative mRNA expression of four human AGO proteins in MCF7 and MCF 10a cells.

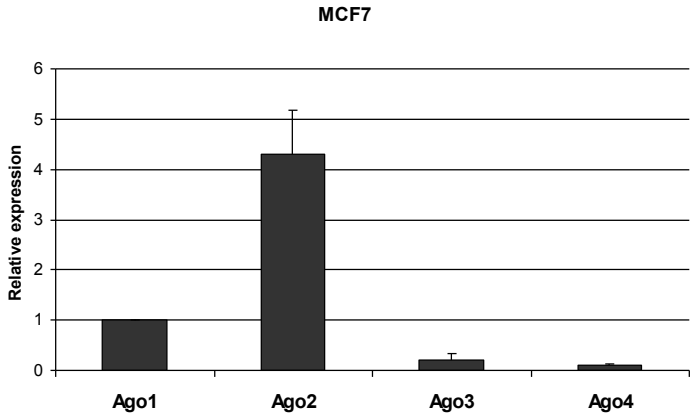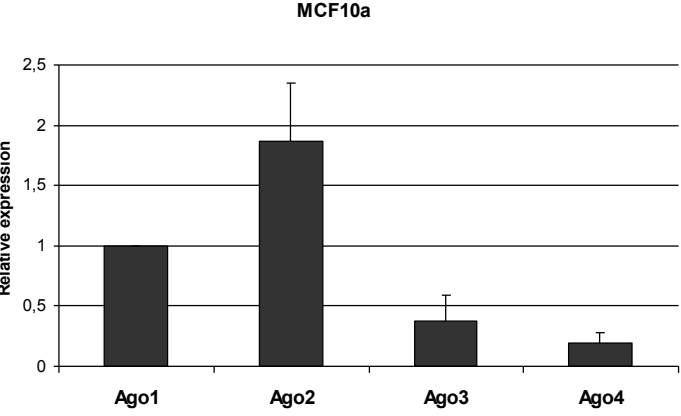

**S2:** TaqMan miRNA Array data performed on AGO1 and AGO2 immunoprecipitates from MCF7 cell lysates (quantile normalized Ct values, mean of 2 replicates).

| miRNA                  | AGO1       | AGO2       | AGO1 - AGO2  | Pre-miRNA strand |
|------------------------|------------|------------|--------------|------------------|
| hsa-miR-27a-4373287    | 22,7108326 | 25,6429944 | -2,932161805 | 3p               |
| hsa-miR-331-3p-4373046 | 21,0664601 | 23,9169649 | -2,850504805 | 3p               |
| hsa-miR-7-1*-4381118   | 25,6456706 | 28,4489174 | -2,803246805 | 3p               |
| hsa-miR-223-4395406    | 28,9383351 | 31,6983179 | -2,759982805 | 3p               |
| hsa-miR-222-4395387    | 22,0658651 | 24,3264319 | -2,260566805 | 3p               |
| hsa-miR-671-3p-4395433 | 26,4881046 | 28,4872449 | -1,999140305 | 3p               |
| hsa-miR-744-4395435    | 24,7962121 | 26,4697534 | -1,673541305 | 5p               |
| hsa-miR-30e*-4373057   | 23,5356746 | 24,9752734 | -1,439598805 | 3p               |
| hsa-miR-526b*-4395494  | 29,2333581 | 30,6153529 | -1,381994805 | 3p               |
| hsa-miR-30a*-4373062   | 24,9439171 | 26,2166564 | -1,272739305 | 3p               |
| hsa-miR-301b-4395503   | 27,3119716 | 28,5231709 | -1,211199305 | 3p               |
| hsa-miR-328-4373049    | 23,9407611 | 25,0871804 | -1,146419305 | 3p               |
| hsa-miR-101-4395364    | 26,6729961 | 27,8188929 | -1,145896805 | 3p               |
| hsa-miR-345-4395297    | 22,6739916 | 23,7664224 | -1,092430805 | 5p               |
| hsa-miR-589*-4380953   | 27,8549606 | 28,8002144 | -0,945253805 | 3p               |
| hsa-miR-27b-4373068    | 23,5004591 | 24,4299394 | -0,929480305 | 3p               |
| hsa-miR-361-5p-4373035 | 26,7567041 | 27,5720149 | -0,815310805 | 3p               |
| hsa-miR-93*-4395250    | 23,8450046 | 24,5673689 | -0,722364305 | 3p               |
| hsa-miR-425-4380926    | 25,5535566 | 26,2452669 | -0,691710305 | 5p               |
| hsa-miR-103-4373158    | 23,7327306 | 24,4237014 | -0,690970805 | 3p               |
| hsa-miR-425*-4395413   | 27,9774236 | 28,6463674 | -0,668943805 | 5p               |
| hsa-miR-532-3p-4395466 | 23,3662046 | 24,0045884 | -0,638383805 | 3p               |
| hsa-miR-34a*-4395427   | 24,8199351 | 25,4582459 | -0,638310805 | 3p               |
| hsa-miR-324-3p-4395272 | 26,9586376 | 27,5848859 | -0,626248305 | 3p               |
| hsa-miR-766-4395177    | 27,8124966 | 28,4323914 | -0,619894805 | 3p               |
| hsa-miR-28-3p-4395557  | 23,8743206 | 24,3988544 | -0,524533805 | 3p               |
| hsa-miR-181a*-4373086  | 28,8410111 | 29,3526284 | -0,511617305 | 3p               |
| hsa-miR-625*-4395543   | 24,2980831 | 24,8054864 | -0,507403305 | 3p               |
| hsa-miR-489-4395469    | 25,4801591 | 25,9843989 | -0,504239805 | 3p               |
| hsa-miR-923-4395264    | 26,4043661 | 26,8654334 | -0,461067305 | Frag 28S rRNA    |
| hsa-miR-191-4395410    | 19,4996751 | 19,9599574 | -0,460282305 | 5p               |
| hsa-miR-126-4395339    | 23,3712936 | 23,8123424 | -0,441048805 | 3p               |
| hsa-miR-652-4395463    | 24,8042466 | 25,2182179 | -0,413971305 | 3p               |
| hsa-miR-30e-4395334    | 25,5659691 | 25,9432004 | -0,377231305 | 5p               |
| hsa-miR-141-4373137    | 26,5978211 | 26,9491994 | -0,351378305 | 3p               |
| hsa-miR-197-4373102    | 23,2354536 | 23,5843784 | -0,348924805 | 3p               |
| hsa-let-7c-4373167     | 26,4580186 | 26,8067889 | -0,348770305 | 5p               |
| hsa-miR-29b-4373288    | 28,0538876 | 28,4008484 | -0,346960805 | 3p               |
| hsa-let-7b-4395446     | 23,7574116 | 24,0290494 | -0,271637805 | 5p               |
| hsa-miR-210-4373089    | 24,8267781 | 25,0784874 | -0,251709305 | 3p               |
| hsa-miR-192-4373108    | 24,6347291 | 24,8784819 | -0,243752805 | 5p               |
| hsa-miR-923-4395264    | 26,5635736 | 26,7864704 | -0,222896805 | Frag 28S rRNA    |
| hsa-miR-374a-4373028   | 22,7573961 | 22,9584609 | -0,201064805 | 5p               |
| hsa-let-7a-4373169     | 23,7069551 | 23,9017264 | -0,194771305 | 5p               |
| hsa-miR-95-4373011     | 26,1272371 | 26,2920529 | -0,164815805 | 3p               |
| hsa-miR-335-4373045    | 24,5471246 | 24,7077554 | -0,160630805 | 5p               |
| hsa-miR-484-4381032    | 19,8175111 | 19,9775409 | -0,160029805 | 5p               |
| hsa-miR-598-4395179    | 25,4620541 | 25,5734569 | -0,111402805 | 3p               |
| hsa-miR-193b-4395478   | 19,8580746 | 19,9634679 | -0,105393305 | 3p               |
| hsa-miR-29a-4395223    | 23,1295306 | 23,2348759 | -0,105345305 | 3p               |
| hsa-miR-92a-4395169    | 22,0433361 | 22,1322714 | -0,088935305 | 3p               |

|                         |            |            |              |    |
|-------------------------|------------|------------|--------------|----|
| hsa-miR-125b-4373148    | 25,8688311 | 25,9549674 | -0,086136305 | 5p |
| hsa-miR-10a-4373153     | 27,9292151 | 28,0037989 | -0,074583805 | 5p |
| hsa-miR-16-4373121      | 20,6214196 | 20,6889314 | -0,067511805 | 5p |
| hsa-miR-130b-4373144    | 25,7321691 | 25,7990649 | -0,066895805 | 3p |
| hsa-miR-26a-4395166     | 23,3552481 | 23,3894649 | -0,034216805 | 5p |
| hsa-miR-181a-4373117    | 27,5555521 | 27,5814769 | -0,025924805 | 5p |
| hsa-miR-218-4373081     | 28,6135736 | 28,6357109 | -0,022137305 | 5p |
| hsa-miR-30d-4373059     | 25,2656491 | 25,2593954 | 0,006253695  | 5p |
| hsa-miR-342-3p-4395371  | 22,0878821 | 22,0748094 | 0,013072695  | 3p |
| hsa-miR-29c-4395171     | 26,3943166 | 26,3757849 | 0,018531695  | 3p |
| hsa-miR-182-4395445     | 26,5287961 | 26,5056394 | 0,023156695  | 5p |
| hsa-miR-185-4395382     | 27,5687141 | 27,5242639 | 0,044450195  | 5p |
| hsa-miR-140-5p-4373374  | 24,2506111 | 24,1967279 | 0,053883195  | 5p |
| hsa-let-7e-4395517      | 20,8301716 | 20,7752354 | 0,054936195  | 5p |
| hsa-miR-200a-4378069    | 24,2651871 | 24,2042264 | 0,060960695  | 3p |
| hsa-miR-301a-4373064    | 22,8310356 | 22,7686149 | 0,062420695  | 3p |
| hsa-miR-375-4373027     | 21,2208981 | 21,1453384 | 0,075559695  | 3p |
| hsa-miR-574-3p-4395460  | 25,6710701 | 25,5918954 | 0,079174695  | 3p |
| hsa-miR-30d-4373059     | 25,4750296 | 25,3866544 | 0,088375195  | 5p |
| hsa-miR-99b-4373007     | 22,3992936 | 22,2944689 | 0,104824695  | 5p |
| hsa-miR-15b-4373122     | 21,4238271 | 21,3183734 | 0,105453695  | 5p |
| hsa-let-7d-4395394      | 22,8398431 | 22,7149309 | 0,124912195  | 5p |
| hsa-miR-151-3p-4395365  | 22,7339691 | 22,6073289 | 0,126640195  | 3p |
| hsa-miR-193a-5p-4395392 | 25,6055076 | 25,4673199 | 0,138187695  | 5p |
| hsa-miR-30a-4373061     | 22,5716426 | 22,4227104 | 0,148932195  | 5p |
| hsa-miR-183*-4395381    | 25,5628021 | 25,4116364 | 0,151165695  | 3p |
| hsa-miR-195-4373105     | 24,6207826 | 24,4621849 | 0,158597695  | 5p |
| hsa-miR-125a-5p-4395309 | 22,7720631 | 22,6056929 | 0,166370195  | 5p |
| hsa-miR-324-5p-4373052  | 25,3807531 | 25,2101554 | 0,170597695  | 5p |
| hsa-miR-454-4395434     | 21,6450946 | 21,4710554 | 0,174039195  | 3p |
| hsa-miR-25-4373071      | 21,5253951 | 21,3416109 | 0,183784195  | 3p |
| hsa-miR-99a-4373008     | 27,3505411 | 27,1662754 | 0,184265695  | 5p |
| hsa-miR-183-4395380     | 26,1211856 | 25,8972974 | 0,223888195  | 5p |
| hsa-miR-149-4395366     | 24,2312401 | 24,0020534 | 0,229186695  | 5p |
| hsa-miR-26b-4395167     | 23,7340496 | 23,4953804 | 0,238669195  | 5p |
| hsa-miR-148b-4373129    | 27,4657036 | 27,2109519 | 0,254751695  | 3p |
| hsa-miR-9*-4395342      | 26,0436951 | 25,7289979 | 0,314697195  | 3p |
| hsa-miR-505*-4395198    | 29,3494021 | 29,0313364 | 0,318065695  | 5p |
| hsa-miR-106b-4373155    | 19,6016321 | 19,2746369 | 0,326995195  | 5p |
| hsa-miR-152-4395170     | 23,0530296 | 22,7141384 | 0,338891195  | 3p |
| hsa-miR-128-4395327     | 26,4057866 | 26,0623424 | 0,343444195  | 3p |
| hsa-miR-24-4373072      | 18,8453951 | 18,4993449 | 0,346050195  | 3p |
| hsa-miR-19b-4373098     | 19,1443886 | 18,7750824 | 0,369306195  | 3p |
| hsa-miR-30c-4373060     | 20,3142456 | 19,9401934 | 0,374052195  | 5p |
| hsa-miR-18a-4395533     | 24,7082646 | 24,3099499 | 0,398314695  | 5p |
| hsa-miR-203-4373095     | 19,4633156 | 19,0246364 | 0,438679195  | 3p |
| hsa-miR-135b-4395372    | 26,2903566 | 25,8459989 | 0,444357695  | 5p |
| hsa-miR-9-4373285       | 25,2543546 | 24,8094914 | 0,444863195  | 5p |
| hsa-miR-30b-4373290     | 21,3103511 | 20,8634704 | 0,446880695  | 5p |
| hsa-miR-200c-4395411    | 19,8501096 | 19,3872954 | 0,462814195  | 3p |
| hsa-miR-100-4373160     | 26,4255126 | 25,9625389 | 0,462973695  | 5p |
| hsa-miR-96-4373372      | 27,9685661 | 27,5041329 | 0,464433195  | 5p |
| hsa-miR-942-4395298     | 27,3626531 | 26,8458124 | 0,516840695  | 5p |
| hsa-miR-340-4395369     | 25,2936351 | 24,7729784 | 0,520656695  | 5p |
| hsa-miR-19a-4373099     | 24,0620106 | 23,5406909 | 0,521319695  | 3p |
| hsa-miR-365-4373194     | 22,4376421 | 21,8875339 | 0,550108195  | 3p |

|                         |            |            |             |    |
|-------------------------|------------|------------|-------------|----|
| hsa-miR-339-3p-4395295  | 25,5707651 | 25,0073834 | 0,563381695 | 3p |
| hsa-miR-339-5p-4395368  | 24,5044726 | 23,8907189 | 0,613753695 | 5p |
| hsa-miR-34a-4395168     | 24,0947661 | 23,4644789 | 0,630287195 | 5p |
| hsa-miR-148a-4373130    | 25,3648211 | 24,7192459 | 0,645575195 | 3p |
| hsa-miR-500-4395539     | 27,0976986 | 26,4504484 | 0,647250195 | 5p |
| hsa-miR-146b-5p-4373178 | 25,2878371 | 24,6247464 | 0,663090695 | 5p |
| hsa-miR-194-4373106     | 27,3574271 | 26,6455844 | 0,711842695 | 3p |
| hsa-miR-340*-4395370    | 27,1872956 | 26,4465824 | 0,740713195 | 5p |
| hsa-miR-501-5p-4373226  | 27,7478911 | 26,9894679 | 0,758423195 | 5p |
| hsa-miR-769-5p-4395186  | 27,2625836 | 26,4470039 | 0,815579695 | 5p |
| hsa-miR-186-4395396     | 23,0891586 | 22,2669944 | 0,822164195 | 5p |
| hsa-let-7g-4395393      | 24,7730906 | 23,9449299 | 0,828160695 | 5p |
| hsa-miR-93-4373302      | 20,1933761 | 19,3583504 | 0,835025695 | 5p |
| hsa-miR-28-5p-4373067   | 25,5930021 | 24,7340634 | 0,858938695 | 5p |
| hsa-miR-98-4373009      | 24,7448826 | 23,8850299 | 0,859852695 | 5p |
| hsa-miR-660-4380925     | 24,1195671 | 23,2490959 | 0,870471195 | 5p |
| hsa-miR-429-4373203     | 25,0955166 | 24,2116539 | 0,883862695 | 3p |
| hsa-let-7f-4373164      | 25,8374551 | 24,9449094 | 0,892545695 | 5p |
| hsa-miR-135a-4373140    | 24,6528466 | 23,7512944 | 0,901552195 | 5p |
| hsa-miR-769-5p-4395186  | 27,3960701 | 26,4870964 | 0,908973695 | 5p |
| hsa-miR-132-4373143     | 24,4730611 | 23,5579749 | 0,915086195 | 3p |
| hsa-miR-335*-4395296    | 25,5261491 | 24,5945774 | 0,931571695 | 3p |
| hsa-miR-320-4395388     | 21,7624811 | 20,8072779 | 0,955203195 | 3p |
| hsa-miR-296-5p-4373066  | 25,3989961 | 24,4254949 | 0,973501195 | 5p |
| hsa-miR-7-4378130       | 27,7717976 | 26,7876864 | 0,984111195 | 5p |
| hsa-miR-532-5p-4380928  | 24,1108931 | 23,1166054 | 0,994287695 | 5p |
| hsa-miR-200b-4395362    | 23,3568091 | 22,2788469 | 1,077962195 | 3p |
| hsa-miR-7-4378130       | 27,8013806 | 26,7211454 | 1,080235195 | 5p |
| hsa-miR-21-4373090      | 18,4337241 | 17,3231909 | 1,110533195 | 5p |
| hsa-miR-20b-4373263     | 24,2134021 | 23,0771789 | 1,136223195 | 5p |
| hsa-miR-20a-4373286     | 20,6647581 | 19,5261814 | 1,138576695 | 5p |
| hsa-miR-590-5p-4395176  | 24,7511536 | 23,6107949 | 1,140358695 | 5p |
| hsa-miR-106a-4395280    | 19,8540316 | 18,6838149 | 1,170216695 | 5p |
| hsa-miR-17-4395419      | 19,7704171 | 18,4849974 | 1,285419695 | 5p |

**S3:** Individual TaqMan miRNA Assays performed on anti-AGO1, anti-AGO2 or anti- $\alpha$ -tubulin immunoprecipitates from lysates of MCF10a cells. The data presented as normalized Ct values (see Materials and Methods section) (n=3).

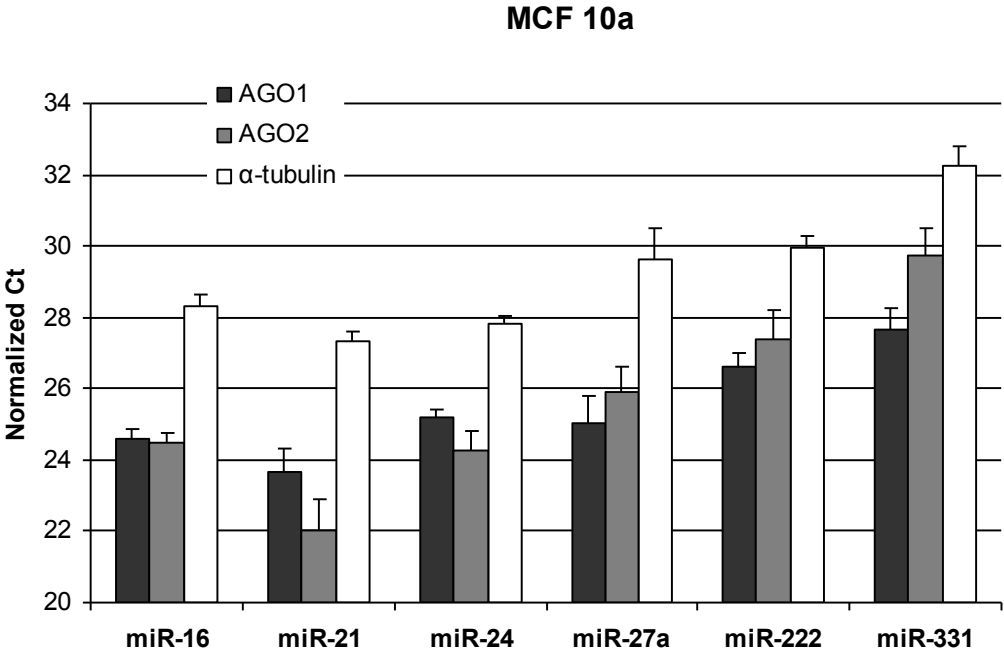

**S4A:** TaqMan miRNA Array data performed on AGO1 and AGO2 immunoprecipitates from blood plasma of individual I (Raw Ct values).

| <b>miRNA</b>           | <b>AGO1</b> | <b>AGO2</b> | <b>AGO1 - AGO2</b> |
|------------------------|-------------|-------------|--------------------|
| hsa-miR-122-4395356    | 28,636946   | 40          | -11,363054         |
| hsa-miR-483-5p-4395449 | 30,914951   | 40          | -9,085049          |
| hsa-miR-142-3p-4373136 | 31,258877   | 40          | -8,741123          |
| hsa-miR-29a-4395223    | 31,868704   | 40          | -8,131296          |
| hsa-miR-223-4395406    | 24,349644   | 26,4857     | -2,136056          |
| hsa-miR-146a-4373132   | 28,4924     | 30,457642   | -1,965242          |
| hsa-miR-24-4373072     | 29,041292   | 30,775253   | -1,733961          |
| hsa-miR-27a-4373287    | 29,114712   | 30,648777   | -1,534065          |
| hsa-miR-21-4373090     | 30,081415   | 31,203772   | -1,122357          |
| hsa-miR-126-4395339    | 29,277035   | 30,342136   | -1,065101          |
| hsa-miR-342-3p-4395371 | 30,584904   | 31,648022   | -1,063118          |
| hsa-miR-222-4395387    | 28,584768   | 29,619698   | -1,03493           |
| hsa-miR-19b-4373098    | 27,07886    | 27,684994   | -0,606134          |
| hsa-miR-19a-4373099    | 31,35113    | 31,654419   | -0,303289          |
| hsa-miR-630-4380970    | 31,775263   | 31,743898   | 0,031365           |
| hsa-miR-484-4381032    | 30,038475   | 29,434378   | 0,604097           |
| hsa-miR-320-4395388    | 30,9198     | 29,921066   | 0,998734           |
| hsa-miR-92a-4395169    | 30,59497    | 29,014816   | 1,580154           |
| hsa-miR-16-4373121     | 29,603903   | 27,325243   | 2,27866            |
| hsa-miR-571-4381016    | 27,733774   | 25,415604   | 2,31817            |
| hsa-miR-580-4381024    | 31,322872   | 28,658083   | 2,664789           |
| hsa-miR-451-4373360    | 30,319492   | 27,360407   | 2,959085           |
| hsa-miR-125b-4373148   | 40          | 31,95515    | 8,04485            |
| hsa-miR-195-4373105    | 40          | 31,606028   | 8,393972           |
| hsa-miR-93-4373302     | 40          | 31,005518   | 8,994482           |
| hsa-miR-20a-4373286    | 40          | 30,156944   | 9,843056           |
| hsa-miR-375-4373027    | 40          | 29,729963   | 10,270037          |
| hsa-miR-106a-4395280   | 40          | 28,921944   | 11,078056          |
| hsa-miR-151-3p-4395365 | 40          | 28,098455   | 11,901545          |
| hsa-miR-17-4395419     | 40          | 27,884151   | 12,115849          |

**S4B:** TaqMan miRNA Array data performed on AGO1 and AGO2 immunoprecipitates from blood plasma of individual II (Raw Ct values).

| <b>miRNA</b>            | <b>AGO1</b> | <b>AGO2</b> | <b>AGO1 - AGO2</b> |
|-------------------------|-------------|-------------|--------------------|
| hsa-miR-571-4381016     | 30,506037   | 40          | -9,493963          |
| hsa-miR-29a-4395223     | 30,6825     | 40          | -9,3175            |
| hsa-miR-130b-4373144    | 30,797941   | 40          | -9,202059          |
| hsa-miR-345-4395297     | 31,028809   | 40          | -8,971191          |
| hsa-miR-192-4373108     | 31,08814    | 40          | -8,91186           |
| hsa-miR-30d-4373059     | 31,193106   | 40          | -8,806894          |
| hsa-miR-199a-3p-4395415 | 31,227825   | 40          | -8,772175          |
| hsa-miR-191-4395410     | 31,27179    | 40          | -8,72821           |
| hsa-miR-30d-4373059     | 31,285448   | 40          | -8,714552          |
| hsa-miR-376c-4395233    | 31,867203   | 40          | -8,132797          |
| hsa-miR-126-4395339     | 26,71944    | 28,9146     | -2,19516           |
| hsa-miR-122-4395356     | 28,284716   | 30,195011   | -1,910295          |
| hsa-miR-223-4395406     | 22,764011   | 24,62363    | -1,859619          |
| hsa-miR-222-4395387     | 27,202097   | 29,039618   | -1,837521          |
| hsa-miR-342-3p-4395371  | 29,224054   | 30,891607   | -1,667553          |
| hsa-miR-30e-4395334     | 29,548569   | 31,173983   | -1,625414          |
| hsa-miR-24-4373072      | 27,234488   | 28,839567   | -1,605079          |
| hsa-miR-21-4373090      | 28,284184   | 29,66935    | -1,385166          |
| hsa-miR-146a-4373132    | 26,597027   | 27,942255   | -1,345228          |
| hsa-miR-186-4395396     | 29,898129   | 30,80517    | -0,907041          |
| hsa-miR-27a-4373287     | 31,002213   | 31,81145    | -0,809237          |
| hsa-miR-484-4381032     | 28,525799   | 28,38211    | 0,143689           |
| hsa-miR-483-5p-4395449  | 30,961372   | 30,791077   | 0,170295           |
| hsa-miR-19b-4373098     | 26,139994   | 25,927797   | 0,212197           |
| hsa-miR-148a-4373130    | 30,52252    | 30,29786    | 0,22466            |
| hsa-miR-590-5p-4395176  | 31,939207   | 31,596146   | 0,343061           |
| hsa-miR-320-4395388     | 28,898619   | 28,51906    | 0,379559           |
| hsa-miR-19a-4373099     | 31,606236   | 29,919563   | 1,686673           |
| hsa-miR-92a-4395169     | 29,649073   | 27,718723   | 1,93035            |
| hsa-miR-20a-4373286     | 31,520672   | 28,89689    | 2,623782           |
| hsa-miR-17-4395419      | 31,485277   | 28,209812   | 3,275465           |
| hsa-miR-16-4373121      | 28,063223   | 24,528778   | 3,534445           |
| hsa-miR-451-4373360     | 30,714417   | 27,014977   | 3,69944            |
| hsa-miR-331-3p-4373046  | 40          | 31,923178   | 8,076822           |
| hsa-miR-106b-4373155    | 40          | 31,851334   | 8,148666           |
| hsa-miR-139-5p-4395400  | 40          | 31,849287   | 8,150713           |
| hsa-miR-93-4373302      | 40          | 31,810877   | 8,189123           |
| hsa-miR-27b-4373068     | 40          | 31,630398   | 8,369602           |
| hsa-miR-486-5p-4378096  | 40          | 31,598492   | 8,401508           |
| hsa-miR-206-4373092     | 40          | 31,540926   | 8,459074           |
| hsa-miR-25-4373071      | 40          | 31,056587   | 8,943413           |
| hsa-miR-195-4373105     | 40          | 30,453007   | 9,546993           |
| hsa-miR-106a-4395280    | 40          | 28,27824    | 11,72176           |



**S4C:** Correlation plot of AGO1 associated miRNAs in immunoprecipitates from blood plasmas of individual I and individual II (Raw Ct values).

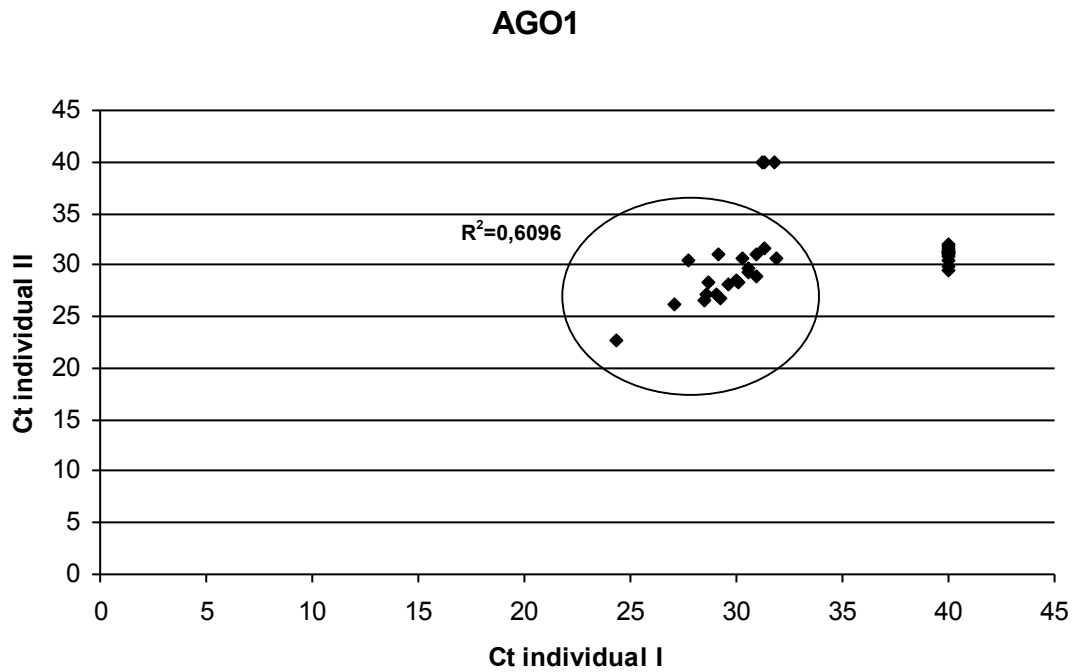

**S4D:** Correlation plot of AGO2 associated miRNAs in immunoprecipitates from blood plasmas of individual I and individual II (Raw Ct values).

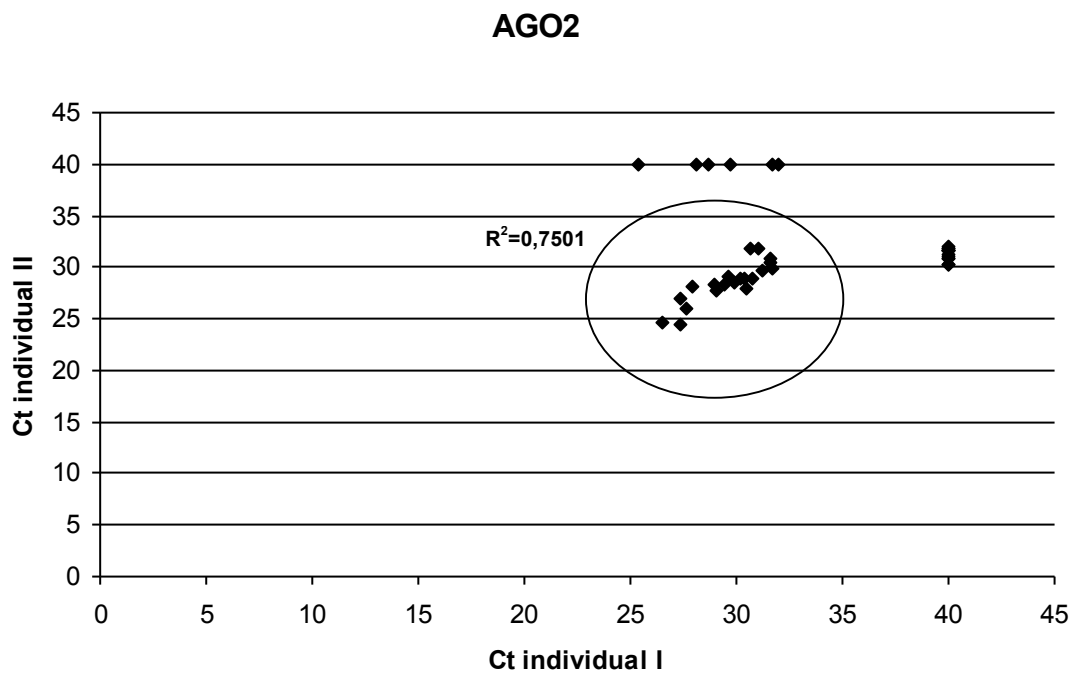

**S5A:** TaqMan miRNA Array data performed on AGO1 and AGO2 immunoprecipitates from blood pellet of individual II (Raw Ct values).

| <b>miRNA</b>           | <b>AGO1</b> | <b>AGO2</b> | <b>AGO1 - AGO2</b> |
|------------------------|-------------|-------------|--------------------|
| hsa-miR-381-4373020    | 25,638899   | 26,769968   | -1,131069          |
| hsa-miR-223-4395406    | 24,114365   | 23,128109   | 0,986256           |
| hsa-miR-150-4373127    | 31,82862    | 29,653612   | 2,175008           |
| hsa-miR-518b-4373246   | 30,480244   | 27,523252   | 2,956992           |
| hsa-miR-486-3p-4395204 | 31,806046   | 28,800121   | 3,005925           |
| hsa-miR-24-4373072     | 31,963638   | 26,249557   | 5,714081           |
| hsa-miR-222-4395387    | 31,076296   | 24,713171   | 6,363125           |
| hsa-miR-126-4395339    | 28,215988   | 21,795301   | 6,420687           |
| hsa-miR-142-3p-4373136 | 29,189371   | 22,749971   | 6,4394             |
| hsa-let-7g-4395393     | 31,423151   | 24,96223    | 6,460921           |
| hsa-miR-21-4373090     | 32,566227   | 25,868574   | 6,697653           |
| hsa-miR-26a-4395166    | 31,563404   | 24,787521   | 6,775883           |
| hsa-miR-19a-4373099    | 29,266283   | 22,251623   | 7,01466            |
| hsa-miR-191-4395410    | 29,9785     | 22,58621    | 7,39229            |
| hsa-miR-20a-4373286    | 28,585323   | 21,170233   | 7,41509            |
| hsa-let-7e-4395517     | 31,985735   | 24,531097   | 7,454638           |
| hsa-miR-19b-4373098    | 27,635164   | 19,745417   | 7,889747           |
| hsa-miR-17-4395419     | 27,961136   | 19,972717   | 7,988419           |
| hsa-miR-491-5p-4381053 | 40          | 31,85885    | 8,14115            |
| hsa-miR-335-4373045    | 40          | 31,8126     | 8,1874             |
| hsa-miR-27b-4373068    | 40          | 31,80964    | 8,19036            |
| hsa-miR-579-4395509    | 40          | 31,79431    | 8,20569            |
| hsa-miR-7-1*-4381118   | 40          | 31,75211    | 8,24789            |
| hsa-miR-7-4378130      | 40          | 31,714664   | 8,285336           |
| hsa-miR-502-5p-4373227 | 40          | 31,699446   | 8,300554           |
| hsa-miR-152-4395170    | 40          | 31,697948   | 8,302052           |
| hsa-miR-96-4373372     | 40          | 31,696957   | 8,303043           |
| hsa-miR-584-4381026    | 40          | 31,684319   | 8,315681           |
| hsa-miR-183*-4395381   | 40          | 31,653175   | 8,346825           |
| hsa-miR-106a-4395280   | 28,609055   | 20,25611    | 8,352945           |
| hsa-miR-215-4373084    | 40          | 31,618055   | 8,381945           |
| hsa-miR-545-4395378    | 40          | 31,608034   | 8,391966           |
| hsa-miR-422a-4395408   | 40          | 31,556896   | 8,443104           |
| hsa-miR-22-4373079     | 40          | 31,545897   | 8,454103           |
| hsa-miR-27a-4373287    | 40          | 31,394814   | 8,605186           |
| hsa-miR-484-4381032    | 30,887224   | 22,274061   | 8,613163           |
| hsa-miR-584-4381026    | 40          | 31,346266   | 8,653734           |
| hsa-miR-181a-4373117   | 40          | 31,33771    | 8,66229            |
| hsa-miR-339-3p-4395295 | 40          | 31,305653   | 8,694347           |
| hsa-miR-550*-4380954   | 40          | 31,111296   | 8,888704           |
| hsa-miR-339-5p-4395368 | 40          | 31,110083   | 8,889917           |
| hsa-miR-92a-4395169    | 31,703476   | 22,764513   | 8,938963           |
| hsa-miR-550-4395521    | 40          | 30,996109   | 9,003891           |
| hsa-miR-423-5p-4395451 | 40          | 30,904917   | 9,095083           |
| hsa-miR-93-4373302     | 31,86734    | 22,69103    | 9,17631            |
| hsa-miR-148b-4373129   | 40          | 30,797009   | 9,202991           |
| hsa-miR-30c-4373060    | 32,03026    | 22,793488   | 9,236772           |
| hsa-miR-130b-4373144   | 40          | 30,757254   | 9,242746           |
| hsa-miR-345-4395297    | 40          | 30,718964   | 9,281036           |
| hsa-miR-144*-4395259   | 30,060793   | 20,764874   | 9,295919           |
| hsa-miR-574-3p-4395460 | 40          | 30,644775   | 9,355225           |

|                         |           |           |           |
|-------------------------|-----------|-----------|-----------|
| hsa-miR-98-4373009      | 40        | 30,615934 | 9,384066  |
| hsa-miR-18b-4395328     | 40        | 30,548227 | 9,451773  |
| hsa-miR-130a-4373145    | 40        | 30,423168 | 9,576832  |
| hsa-miR-598-4395179     | 40        | 30,403711 | 9,596289  |
| hsa-miR-183-4395380     | 40        | 30,343008 | 9,656992  |
| hsa-miR-340-4395369     | 40        | 30,279583 | 9,720417  |
| hsa-miR-15a*-4395530    | 40        | 30,276146 | 9,723854  |
| hsa-miR-362-5p-4378092  | 40        | 29,916864 | 10,083136 |
| hsa-miR-196b-4395326    | 40        | 29,89862  | 10,10138  |
| hsa-miR-328-4373049     | 40        | 29,896118 | 10,103882 |
| hsa-miR-451-4373360     | 30,520874 | 20,39169  | 10,129184 |
| hsa-miR-342-3p-4395371  | 40        | 29,860252 | 10,139748 |
| hsa-miR-363-4378090     | 40        | 29,845613 | 10,154387 |
| hsa-miR-142-5p-4395359  | 40        | 29,841791 | 10,158209 |
| hsa-miR-190-4373110     | 40        | 29,836325 | 10,163675 |
| hsa-miR-30e*-4373057    | 40        | 29,803423 | 10,196577 |
| hsa-miR-146a-4373132    | 40        | 29,759563 | 10,240437 |
| hsa-miR-182-4395445     | 40        | 29,754082 | 10,245918 |
| hsa-miR-29a-4395223     | 40        | 29,706394 | 10,293606 |
| hsa-miR-29c-4395171     | 40        | 29,688707 | 10,311293 |
| hsa-miR-148a-4373130    | 40        | 29,66976  | 10,33024  |
| hsa-miR-500-4395539     | 40        | 29,510494 | 10,489506 |
| hsa-miR-32-4395220      | 40        | 29,403378 | 10,596622 |
| hsa-miR-132-4373143     | 40        | 29,343214 | 10,656786 |
| hsa-miR-501-5p-4373226  | 40        | 29,302124 | 10,697876 |
| hsa-miR-16-4373121      | 28,625822 | 17,901983 | 10,723839 |
| hsa-miR-942-4395298     | 40        | 29,204826 | 10,795174 |
| hsa-miR-625*-4395543    | 40        | 29,005266 | 10,994734 |
| hsa-miR-486-5p-4378096  | 30,803997 | 19,708715 | 11,095282 |
| hsa-miR-210-4373089     | 40        | 28,518    | 11,482    |
| hsa-miR-146b-5p-4373178 | 40        | 28,355272 | 11,644728 |
| hsa-miR-15a-4373123     | 40        | 28,240925 | 11,759075 |
| hsa-miR-301a-4373064    | 40        | 28,188934 | 11,811066 |
| hsa-let-7f-4373164      | 40        | 28,086067 | 11,913933 |
| hsa-miR-15b*-4395284    | 40        | 28,012547 | 11,987453 |
| hsa-miR-532-3p-4395466  | 40        | 28,012493 | 11,987507 |
| hsa-miR-194-4373106     | 40        | 27,92964  | 12,07036  |
| hsa-miR-324-3p-4395272  | 40        | 27,84215  | 12,15785  |
| hsa-miR-103-4373158     | 40        | 27,592829 | 12,407171 |
| hsa-miR-101-4395364     | 40        | 27,5166   | 12,4834   |
| hsa-miR-30d-4373059     | 40        | 27,477182 | 12,522818 |
| hsa-miR-652-4395463     | 40        | 27,205982 | 12,794018 |
| hsa-miR-628-5p-4395544  | 40        | 27,140251 | 12,859749 |
| hsa-miR-30d-4373059     | 40        | 26,992323 | 13,007677 |
| hsa-miR-331-3p-4373046  | 40        | 26,976229 | 13,023771 |
| hsa-miR-126*-4373269    | 40        | 26,759695 | 13,240305 |
| hsa-miR-140-5p-4373374  | 40        | 26,747473 | 13,252527 |
| hsa-miR-18a-4395533     | 40        | 26,703035 | 13,296965 |
| hsa-miR-185-4395382     | 40        | 26,62977  | 13,37023  |
| hsa-let-7d-4395394      | 40        | 26,541643 | 13,458357 |
| hsa-miR-532-5p-4380928  | 40        | 26,518152 | 13,481848 |
| hsa-let-7a-4373169      | 40        | 26,470129 | 13,529871 |
| hsa-miR-590-5p-4395176  | 40        | 26,312796 | 13,687204 |
| hsa-miR-660-4380925     | 40        | 26,235348 | 13,764652 |
| hsa-miR-192-4373108     | 40        | 26,22943  | 13,77057  |

|                        |    |           |           |
|------------------------|----|-----------|-----------|
| hsa-miR-140-3p-4395345 | 40 | 26,217299 | 13,782701 |
| hsa-miR-30a-4373061    | 40 | 26,14115  | 13,85885  |
| hsa-miR-93*-4395250    | 40 | 26,07145  | 13,92855  |
| hsa-miR-30e-4395334    | 40 | 25,564514 | 14,435486 |
| hsa-miR-374a-4373028   | 40 | 24,891895 | 15,108105 |
| hsa-miR-25-4373071     | 40 | 24,87833  | 15,12167  |
| hsa-miR-425-4380926    | 40 | 24,875147 | 15,124853 |
| hsa-miR-195-4373105    | 40 | 24,663609 | 15,336391 |
| hsa-miR-20b-4373263    | 40 | 24,56942  | 15,43058  |
| hsa-miR-186-4395396    | 40 | 24,421972 | 15,578028 |
| hsa-miR-106b-4373155   | 40 | 24,117083 | 15,882917 |
| hsa-miR-30b-4373290    | 40 | 24,106403 | 15,893597 |
| hsa-miR-374b-4381045   | 40 | 24,104197 | 15,895803 |
| hsa-let-7b-4395446     | 40 | 24,034248 | 15,965752 |
| hsa-miR-454-4395434    | 40 | 23,828272 | 16,171728 |
| hsa-miR-26b-4395167    | 40 | 23,441753 | 16,558247 |
| hsa-miR-320-4395388    | 40 | 23,231745 | 16,768255 |
| hsa-miR-15b-4373122    | 40 | 22,80338  | 17,19662  |
| hsa-miR-573-4381018    | 40 | 21,954771 | 18,045229 |
| hsa-miR-148b*-4395271  | 40 | 21,883987 | 18,116013 |
| hsa-miR-151-3p-4395365 | 40 | 21,748043 | 18,251957 |
| hsa-miR-378-4395354    | 40 | 17,609705 | 22,390295 |
| hsa-miR-513-3p-4395202 | 40 | 15,115705 | 24,884295 |

**S5B:** TaqMan miRNA Array data performed on AGO1 and AGO2 immunoprecipitates from blood pellet of individual III (Raw Ct values).

| <b>miRNA</b>            | <b>AGO1</b> | <b>AGO2</b> | <b>AGO1-AGO2</b> |
|-------------------------|-------------|-------------|------------------|
| hsa-miR-199a-3p-4395415 | 31,168928   | 40          | -8,831072        |
| hsa-miR-145-4395389     | 31,632622   | 40          | -8,367378        |
| hsa-miR-223-4395406     | 22,849426   | 23,605043   | -0,755617        |
| hsa-miR-518b-4373246    | 31,433933   | 31,972694   | -0,538761        |
| hsa-miR-381-4373020     | 26,417217   | 26,895527   | -0,47831         |
| hsa-miR-628-5p-4395544  | 29,846243   | 29,96584    | -0,119597        |
| hsa-miR-150-4373127     | 29,263773   | 29,3197     | -0,055927        |
| hsa-miR-513-3p-4395202  | 15,643252   | 15,628298   | 0,014954         |
| hsa-miR-378-4395354     | 17,990673   | 17,916517   | 0,074156         |
| hsa-miR-573-4381018     | 24,39858    | 24,170496   | 0,228084         |
| hsa-miR-27a-4373287     | 30,719912   | 30,270973   | 0,448939         |
| hsa-miR-151-3p-4395365  | 23,401949   | 22,738398   | 0,663551         |
| hsa-miR-146a-4373132    | 30,954912   | 29,773336   | 1,181576         |
| hsa-miR-29a-4395223     | 30,442215   | 28,790747   | 1,651468         |
| hsa-miR-342-3p-4395371  | 31,650774   | 29,504938   | 2,145836         |
| hsa-miR-24-4373072      | 29,739359   | 27,123766   | 2,615593         |
| hsa-miR-222-4395387     | 29,77073    | 25,663511   | 4,107219         |
| hsa-miR-26a-4395166     | 29,898905   | 25,146996   | 4,751909         |
| hsa-miR-142-3p-4373136  | 26,595486   | 21,472414   | 5,123072         |
| hsa-miR-186-4395396     | 31,563702   | 26,239763   | 5,323939         |
| hsa-miR-21-4373090      | 30,854717   | 25,036896   | 5,817821         |
| hsa-miR-191-4395410     | 29,90711    | 23,987335   | 5,919775         |
| hsa-miR-126-4395339     | 28,738089   | 22,786638   | 5,951451         |
| hsa-miR-484-4381032     | 29,856455   | 23,391188   | 6,465267         |
| hsa-let-7e-4395517      | 31,173992   | 24,487158   | 6,686834         |
| hsa-miR-19a-4373099     | 30,122663   | 23,356747   | 6,765916         |
| hsa-miR-106b-4373155    | 31,32993    | 24,39331    | 6,93662          |
| hsa-miR-30c-4373060     | 30,750818   | 23,570463   | 7,180355         |
| hsa-let-7b-4395446      | 31,47889    | 24,157877   | 7,321013         |
| hsa-miR-19b-4373098     | 27,62679    | 20,304308   | 7,322482         |
| hsa-miR-26b-4395167     | 31,213076   | 23,825115   | 7,387961         |
| hsa-let-7g-4395393      | 31,5353     | 24,133736   | 7,401564         |
| hsa-miR-17-4395419      | 28,7818     | 21,329924   | 7,451876         |
| hsa-miR-20a-4373286     | 29,38919    | 21,714304   | 7,674886         |
| hsa-miR-106a-4395280    | 29,540714   | 21,700811   | 7,839903         |
| hsa-miR-93-4373302      | 30,870228   | 22,964115   | 7,906113         |
| hsa-miR-29b-4373288     | 40          | 31,98894    | 8,01106          |
| hsa-miR-152-4395170     | 40          | 31,969595   | 8,030405         |
| hsa-miR-92a-4395169     | 30,702091   | 22,602629   | 8,099462         |
| hsa-miR-598-4395179     | 40          | 31,886284   | 8,113716         |
| hsa-miR-128-4395327     | 40          | 31,871023   | 8,128977         |
| hsa-miR-215-4373084     | 40          | 31,794565   | 8,205435         |
| hsa-miR-125b-4373148    | 40          | 31,75251    | 8,24749          |
| hsa-miR-339-5p-4395368  | 40          | 31,699211   | 8,300789         |
| hsa-miR-15b-4373122     | 31,165247   | 22,830708   | 8,334539         |
| hsa-miR-629-4395547     | 40          | 31,628384   | 8,371616         |
| hsa-miR-15a*-4395530    | 40          | 31,615097   | 8,384903         |
| hsa-miR-101*-4395254    | 40          | 31,541912   | 8,458088         |
| hsa-miR-32-4395220      | 40          | 31,511496   | 8,488504         |
| hsa-miR-886-5p-4395304  | 40          | 31,31994    | 8,68006          |
| hsa-miR-96-4373372      | 40          | 31,25358    | 8,74642          |

|                         |           |           |           |
|-------------------------|-----------|-----------|-----------|
| hsa-miR-501-5p-4373226  | 40        | 31,213331 | 8,786669  |
| hsa-miR-7-4378130       | 40        | 31,19789  | 8,80211   |
| hsa-miR-183-4395380     | 40        | 31,180677 | 8,819323  |
| hsa-miR-584-4381026     | 40        | 31,169502 | 8,830498  |
| hsa-miR-29c-4395171     | 40        | 31,149374 | 8,850626  |
| hsa-miR-20a*-4395548    | 40        | 31,121347 | 8,878653  |
| hsa-miR-335-4373045     | 40        | 31,103786 | 8,896214  |
| hsa-miR-148b-4373129    | 40        | 30,995043 | 9,004957  |
| hsa-miR-942-4395298     | 40        | 30,943277 | 9,056723  |
| hsa-miR-181a-4373117    | 40        | 30,929596 | 9,070404  |
| hsa-miR-579-4395509     | 40        | 30,838549 | 9,161451  |
| hsa-miR-345-4395297     | 40        | 30,814535 | 9,185465  |
| hsa-miR-296-5p-4373066  | 40        | 30,72054  | 9,27946   |
| hsa-miR-132-4373143     | 40        | 30,658602 | 9,341398  |
| hsa-miR-210-4373089     | 40        | 30,622747 | 9,377253  |
| hsa-miR-98-4373009      | 40        | 30,59017  | 9,40983   |
| hsa-miR-574-3p-4395460  | 40        | 30,538555 | 9,461445  |
| hsa-miR-340-4395369     | 40        | 30,486877 | 9,513123  |
| hsa-miR-16-4373121      | 27,447495 | 17,890827 | 9,556668  |
| hsa-miR-18b-4395328     | 40        | 30,408611 | 9,591389  |
| hsa-miR-182-4395445     | 40        | 30,303276 | 9,696724  |
| hsa-miR-625*-4395543    | 40        | 30,20362  | 9,79638   |
| hsa-miR-500-4395539     | 40        | 30,14331  | 9,85669   |
| hsa-miR-99a-4373008     | 40        | 30,088911 | 9,911089  |
| hsa-miR-130b-4373144    | 40        | 30,069412 | 9,930588  |
| hsa-miR-328-4373049     | 40        | 29,999636 | 10,000364 |
| hsa-miR-15a-4373123     | 40        | 29,950457 | 10,049543 |
| hsa-miR-148a-4373130    | 40        | 29,894688 | 10,105312 |
| hsa-miR-423-5p-4395451  | 40        | 29,874271 | 10,125729 |
| hsa-miR-363-4378090     | 40        | 29,77044  | 10,22956  |
| hsa-miR-22-4373079      | 40        | 29,75304  | 10,24696  |
| hsa-miR-148b*-4395271   | 40        | 29,671225 | 10,328775 |
| hsa-miR-451-4373360     | 30,25624  | 19,858637 | 10,397603 |
| hsa-miR-30e*-4373057    | 40        | 29,557474 | 10,442526 |
| hsa-miR-190-4373110     | 40        | 28,976349 | 11,023651 |
| hsa-miR-486-5p-4378096  | 31,908915 | 20,884706 | 11,024209 |
| hsa-miR-15b*-4395284    | 40        | 28,842974 | 11,157026 |
| hsa-miR-324-3p-4395272  | 40        | 28,83671  | 11,16329  |
| hsa-miR-142-5p-4395359  | 40        | 28,711683 | 11,288317 |
| hsa-let-7f-4373164      | 40        | 28,580782 | 11,419218 |
| hsa-miR-301a-4373064    | 40        | 28,561148 | 11,438852 |
| hsa-miR-146b-5p-4373178 | 40        | 28,52478  | 11,47522  |
| hsa-miR-130a-4373145    | 40        | 28,481104 | 11,518896 |
| hsa-miR-100-4373160     | 40        | 28,362228 | 11,637772 |
| hsa-miR-532-3p-4395466  | 40        | 28,29889  | 11,70111  |
| hsa-miR-126*-4373269    | 40        | 28,205154 | 11,794846 |
| hsa-miR-331-3p-4373046  | 40        | 28,024942 | 11,975058 |
| hsa-miR-590-5p-4395176  | 40        | 27,925085 | 12,074915 |
| hsa-miR-101-4395364     | 40        | 27,80815  | 12,19185  |
| hsa-miR-140-5p-4373374  | 40        | 27,68894  | 12,31106  |
| hsa-miR-30d-4373059     | 40        | 27,678032 | 12,321968 |
| hsa-miR-30d-4373059     | 40        | 27,535547 | 12,464453 |
| hsa-miR-194-4373106     | 40        | 27,518944 | 12,481056 |
| hsa-miR-140-3p-4395345  | 40        | 27,348917 | 12,651083 |
| hsa-miR-425-4380926     | 40        | 27,276228 | 12,723772 |
| hsa-miR-93*-4395250     | 40        | 27,25437  | 12,74563  |

|                        |    |           |           |
|------------------------|----|-----------|-----------|
| hsa-miR-486-3p-4395204 | 40 | 27,21634  | 12,78366  |
| hsa-miR-532-5p-4380928 | 40 | 27,211712 | 12,788288 |
| hsa-miR-185-4395382    | 40 | 26,98771  | 13,01229  |
| hsa-miR-652-4395463    | 40 | 26,896616 | 13,103384 |
| hsa-miR-18a-4395533    | 40 | 26,701378 | 13,298622 |
| hsa-miR-103-4373158    | 40 | 26,68623  | 13,31377  |
| hsa-miR-660-4380925    | 40 | 26,58988  | 13,41012  |
| hsa-miR-192-4373108    | 40 | 26,412561 | 13,587439 |
| hsa-miR-30a-4373061    | 40 | 26,331047 | 13,668953 |
| hsa-let-7d-4395394     | 40 | 26,267761 | 13,732239 |
| hsa-miR-374b-4381045   | 40 | 26,125736 | 13,874264 |
| hsa-let-7a-4373169     | 40 | 25,974287 | 14,025713 |
| hsa-miR-30e-4395334    | 40 | 25,872934 | 14,127066 |
| hsa-miR-374a-4373028   | 40 | 25,533169 | 14,466831 |
| hsa-miR-195-4373105    | 40 | 25,151546 | 14,848454 |
| hsa-miR-454-4395434    | 40 | 24,725885 | 15,274115 |
| hsa-miR-25-4373071     | 40 | 24,713589 | 15,286411 |
| hsa-miR-30b-4373290    | 40 | 24,509619 | 15,490381 |
| hsa-miR-20b-4373263    | 40 | 24,385462 | 15,614538 |
| hsa-miR-320-4395388    | 40 | 23,8335   | 16,1665   |
| hsa-miR-144*-4395259   | 40 | 21,740314 | 18,259686 |

**S5C:** Correlation plot of AGO1 associated miRNAs in immunoprecipitates from blood pellets of individual II and individual III (Raw Ct values).

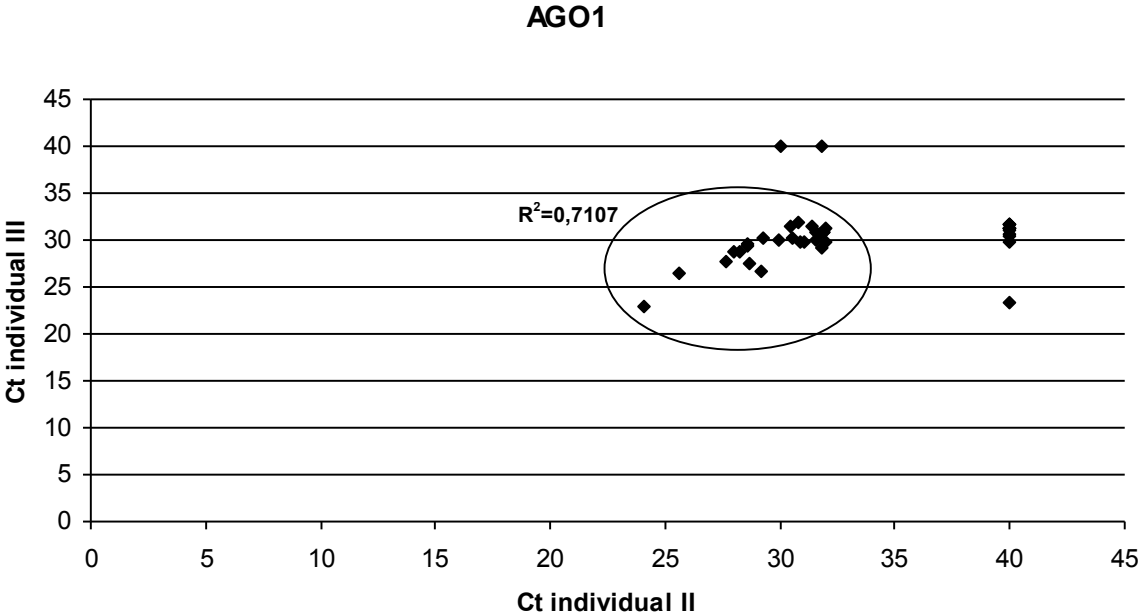

**S5D:** Correlation plot of AGO2 associated miRNAs in immunoprecipitates from blood pellets of individual II and individual III (Raw Ct values).

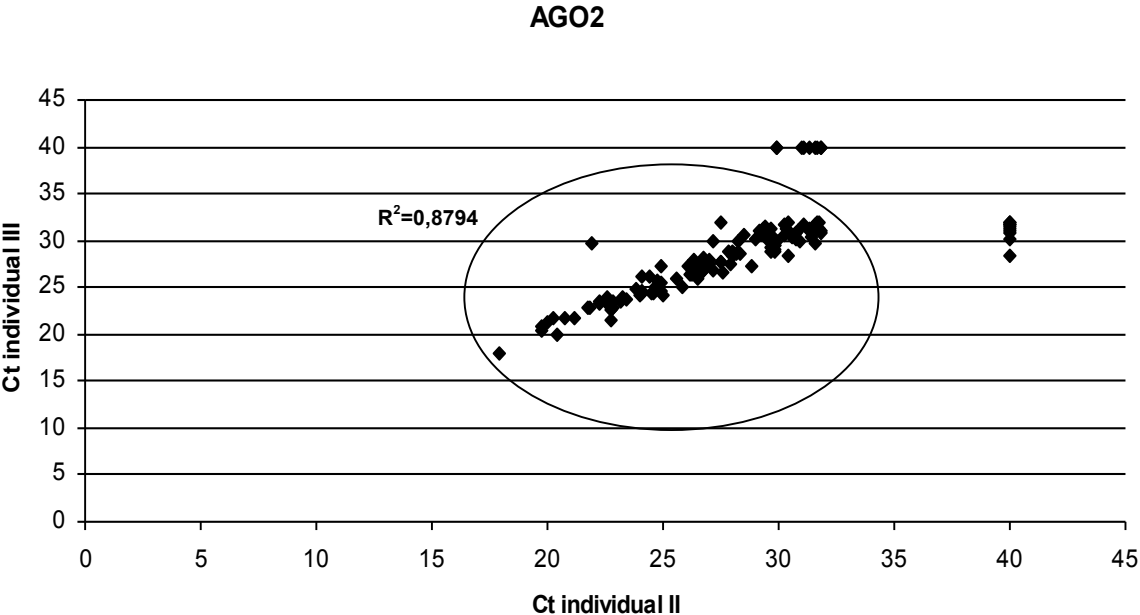



**S6:** miRNA-146a TaqMan miRNA Assays performed on anti-AGO1, anti-AGO2 or anti- $\alpha$ -tubulin immunoprecipitates from blood plasmas and blood pellets of two different individuals. The data presented as mean Ct values (+SD) normalized on cel-mir-39 spiked in control

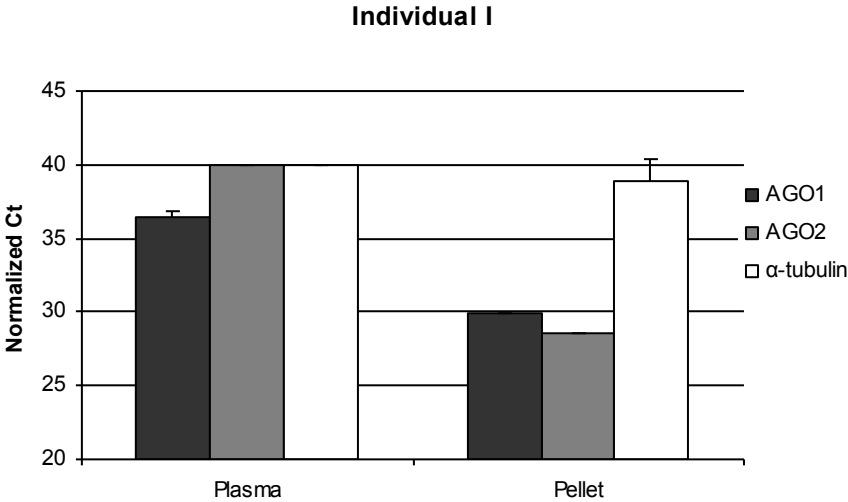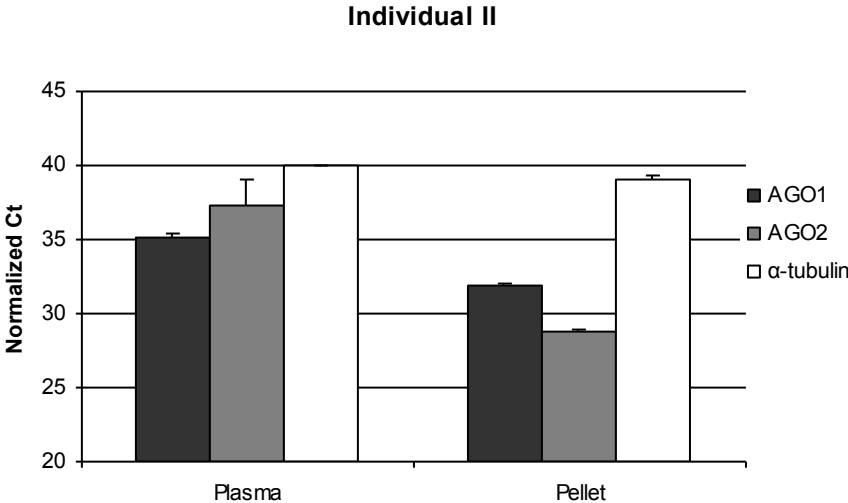

Supplement: rna-9-1066-s01.pdf [file rna-9-1066-s01.pdf]
